# Supplementary material for: 10-Gingerol, a natural AMPK agonist, suppresses neointimal hyperplasia and inhibits vascular smooth muscle cell proliferation
Source: Royal Society of Chemistry journal article supplement (doi:10.1039/d1fo03610f), 2022-01-01
Supplement: d1fo03610f1.pdf [file d1fo03610f1.pdf]

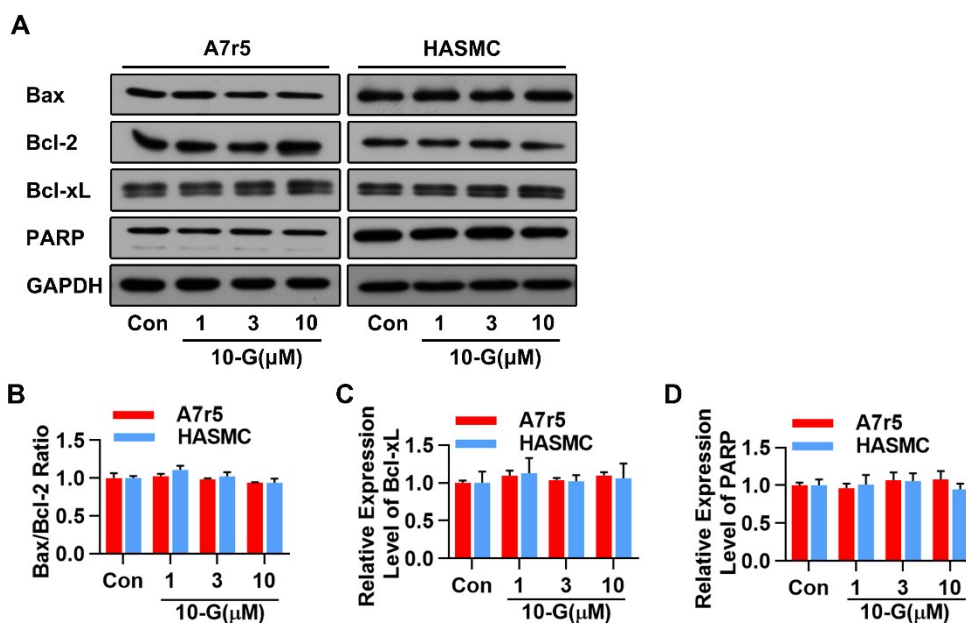

1

2 **Figure S1 10-G did not induce cell apoptosis of VSMC**

3 (A) The expressions of Bax, Bcl-2, Bcl-xL and PARP were tested by western blotting.

4 (B-D) Relative expression levels of Bax, Bcl-2, Bcl-xL and PARP (n=3). Data were

5 presented as mean  $\pm$  SD.

6

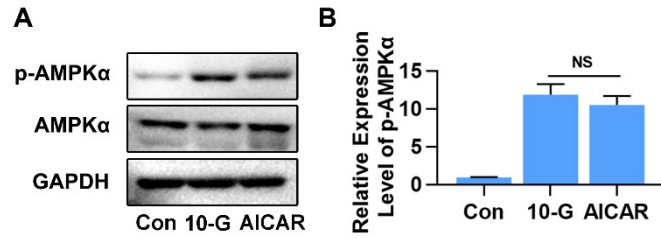

7

8 **Figure S2 10-G and AICAR inhibited proliferation and migration of HASMCs.**

9 (A) A7r5 cells were respectively incubated with 10-G (10 μM) and AICAR (1mM)

10 for 6h, followed by western blotting to determine the expression levels of p-AMPKα

11 and AMPKα (n=3). (B) Relative phosphorylation level of AMPK (n=3). Data are

12 presented as mean ± SD. \*  $p < 0.05$ , \*\*  $p < 0.01$  compared with the Control group.

13
